# Supplementary material
Source: Springer Nature journal article supplement (https://www.springermedizin.de/resource/supplementary/12955_2013_1318_MOESM4_ESM.pdf/9559548)
Supplement: MOESM4 [file 9559548]

**A**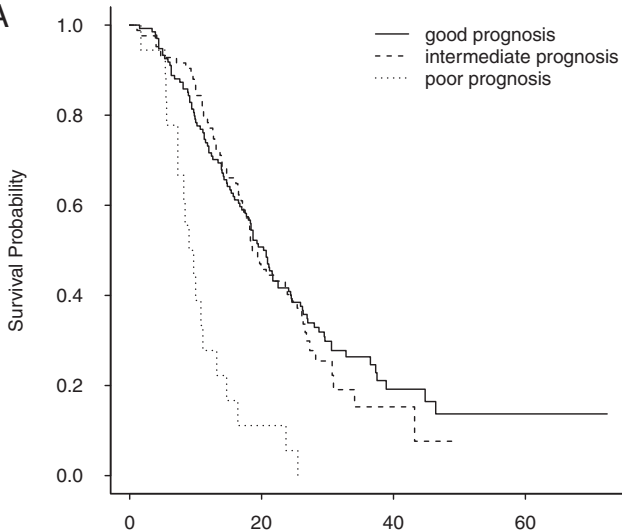

Number at risk

Months

|                        |       |     |    |    |   |
|------------------------|-------|-----|----|----|---|
| good prognosis         | —     | 134 | 68 | 10 | 2 |
| intermediate prognosis | - - - | 84  | 36 | 2  |   |
| poor prognosis         | ...   | 18  | 2  |    |   |

**B**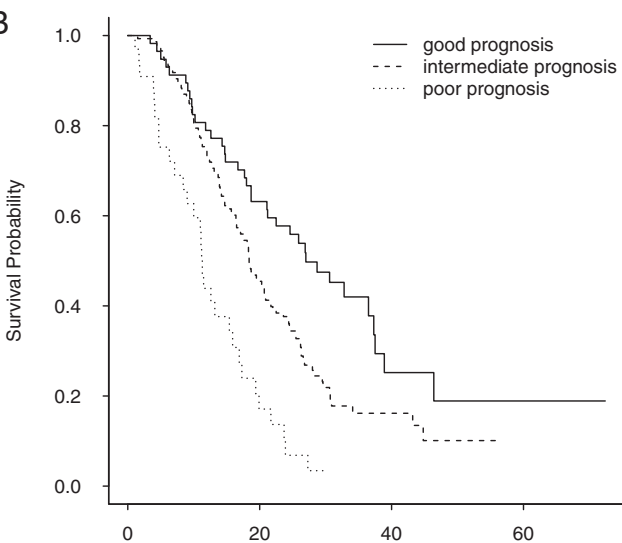

Number at risk

Months

|                        |       |     |    |   |   |
|------------------------|-------|-----|----|---|---|
| good prognosis         | —     | 57  | 36 | 6 | 2 |
| intermediate prognosis | - - - | 146 | 65 | 6 |   |
| poor prognosis         | ...   | 33  | 5  |   |   |
